# Supplementary material for: Effect of Low-Intensity High-Repetition Versus High-Intensity Low-Repetition Elastic Band Resistance Training on Functional Physical Fitness and Myokine Levels in Older Adults
Source: MDPI journal article supplement (doi:10.3390/app15020757), 2025-01-14
Supplement: s1 [file s1]

## Sheet: Sheet1
	Plantar D _Pre	Plantar D _Post	Dorsi D _Pre	Dorsi D _Post	STS Power _Pre	STS Power _Post
1	11.3	9.3	7.4	8.5	1.2	1.4
1	8.5	12.3	8	8.4	2.1	2.4
1	16.3	13.3	11.5	10.9	1.5	1.4
1	13.1	11.9	11.2	11	1	1.2
1	6.9	12.5	8.9	9.3	1.2	1
1	13	12.2	6.4	9.7	2.2	3
1	13.2	12.8	10.1	10.6	3.6	3.8
1	11	11.9	11.3	10.8	1.6	1.6
1	10.7	11	8.3	7.8	1.6	1.6
1	14.9	13.9	10.6	8.7	2.9	2.2
2	13.4	13.8	7.4	8.8	1.9	2
2	12.8	12.1	10.4	12.2	1.4	3.1
2	14.2	15	10.3	11	3.1	3
2	15.7	16.3	6.6	7.6	1.8	2
2	9.6	10.2	10.2	11.2	1.3	1.5
2	10.7	11.5	9.5	10.2	1.7	1.8
2	8.8	9.5	7.3	7	1.2	1.4
2	7.5	8.4	7.9	7.8	1.9	1.8
2	11	11.8	10	10.8	1.5	1.9
2	8.2	9.8	10.3	11.2	1.2	1.2
3	17.6	18	12.8	13.2	1.3	1.4
3	8.2	8.1	7.8	8.4	1.2	1.5
3	10.7	10.5	9	9.9	1.2	1.1
3	8.6	9.7	8.5	9.3	2.7	2.1
3	10.8	9.5	8.2	9.2	1.9	2
3	9.7	10.9	7.6	8.8	2.7	2.4
3	8.2	9.7	9	10.9	2.2	2.7
3	10.7	11.7	9.4	10.2	1.8	2.5
3	12.2	13	10	11.1	1.2	1.7
3	14.3	14	11.3	12.5	1.4	1.6
